# Supplementary material
Source: publisher figshare collection journal article supplement (https://gsajournals.figshare.com/ndownloader/files/27046436)
Supplement: Supplementary file 1 [file 27046436]

**The nucleotide sequences of *NUKU2* transcripts and the amino acid sequences of putative ORFs.** *NUKU2* transcripts were identified in GenBank (EU224311.1) or by PCR and 5’ and 3’ RACE analysis from cDNA derived from human testis. Putative ORFs were identified in these transcripts (red bolded text) and the resulting proteins were compared to Ku70p by multisequence alignment by MUSCLE (3.8).

>NUKU2_testis_mRNA (2157bp).

TTTTTCTTCATCATTTTGAATATATCATCCCACTCTCTCTTGTTCTGCAAGGTTTCTGCTATGAAATCCATTGTGGGTTACCTCCCTGTGCCAAAGTGAGCAGTAGCCAaCACATCAGGGTGTGAGTCTTATTATAAAACCGAGGGTGATGAAGAAGCAGAAGAAGAAGAGGACCTTGAAGCAAGTGAATACTAGAAATATTCAGGAAGTGATAGTTTAATTTTTTTTGGTTGATGCCTCCAGGGCTATGTTTGAATCTCAGAGCGAAGGTGAGTTGACTCCTTTTGACATGAGCATCCAGTGTATCCAAAGTGTGTACATGAGTAAGATCATAAGCAGTGATCGAGATCTTTATGATACTGAGAAAGACAAAAATTCAGTGAATTTTAAAAATATTTACGTCTTACAGGAGTTGGAAAATCCAGGTGCAAAACAAATTCTAAAGCTTGACCAGTTTAAGGGGCAGCAGGGACAAAAATGTTTCGAAGACCTGATGGGCCATGGATCTGACTACTCATTCAGTGAAGTTCTGTGGGTCTGTGCCAAACTGTTTAGTGATATCCAGTTCAAGATGAGTCATAGAAAATCATGCTGCTCACCAATGAAGACAACCCTCATGGCAATGACAGTGTTAAGGCCTGCCAGGCCAGGACCAAAGCCGGTGATCTACGAGATATAGGCATCTTCCTTGACTTGATGCCCCTGAAGAAACCTGGGGGCTTTGACATATCCTTGTTCTACAGAGATATCATCAGCATGGCAAAGGATGAGGACCTCATCCTTTGAGGAATCCAGTTCACTTTGAGGAATCCAGCAATCTAGAAGACCTGTTGCAGAAGGTTCGTGCCAAGGAGACCAGGAAATGGGCACTCAGCAGGTTAAAGCTGAAGCTCAACAAAGACATAGTGATCTCTGTGGGCATTTACAGTCTCGTCCAGAAGGCTCTCAAGCCTCCTTCAATAAAACTCTATCGGAAAACAAATGAACCAGTGAAAACCAAGTCCCGGAAATTTAATATTAATACCGGCAGTTTGCTTCTGCCTAGCGATACCAAGCGGTCTCAGATCTATGGGAGTCATCAGATTATACTGGAGAAAGAGGAAACAGAAGAGCTAAAATGGTTTGATGAACCAGCTTTGATGCTCATGGTTTTCAAGCCCTTGGTAATGCTGAAGGAGCACCATTACCCGAGGCCCTCCTTGTTCACGTACCCTGAGGAGTCGCCGGTGAATGGGAGTTCAACCCTGTTCAGTGCTCTGCTCATTAAGTGTCTGGAGAAGGTGGTCATAGCATTGTGCAGATACACACCCCGCAGGAACATCCCCCCTTATTTGGTGGCTTTGGTGTCACAGGAAGAGGAGTTGGATGACCAGAAAATTCAGGTGACTACTCCAGGTTTCCAGCTGGTCTTTTTACCCTTTGCTGATGATAAAAGGAAGGTGCCCTTTACTGAAAAAGTCATGGCAACTCCAGAGCAGGTGGACAACATGAAGGCTATCATTCAGAAGCTCTGCTTCACATACAGAAGTGACAGCTTTGAGAACCCCGTGCTGCAGCAGCACTTCGGGAACCTGGAGCCCTTGATCTTGTATTTGATGGAGGAACAAGCAGTGGACCTTATATTACCCAAGGTTGAAGAAATGAATAAAAGACTGGGCTCCATGGTGAATGAGTTTAAGGAACTTGTCTACTCACCAGATTATAATCCTGAAGGGAAAATTACCAAGAGAAAATGCAATAATGAAGGTTCCAGAAGCAAAAGGCCCAAGCGGAGTATTCAGAAGAGGAGCTGAAGACCCACATCAGCAAGGGCACATTGGGAAAGTTCACTGTGCCAATGATGAAAGAGGCCTGCCTGGAGTACTGGCTGAAGAAGCAGGAGCTGCTAGAAGCCCTCACCAAGCACTTCCAGGACTGACCAGAGGCCGCGCCTCTGGCTGCCCTTCCACACTGTGGCCAGGCTGCCTGGCCTTGTTCTCAGCCAGTTAAAACATGTTTCTCCTGAGCTAGGAAGAGTCTGCCCAACAGAAGTCGAGGGACTTTACGTTTATGAGGCTTTCTGTTGTCATGGTGATGGTGTAGCCCTCCCACTTTGCTGTTCCTTACTCTATCGTCTGAATAAAGAGCCCCAACTTTGTACTATTAAAAAAAAAAAAA

> NUKU2_testis Predicted protein encoded(217aa) Predicted size 25kDa

MLMVFKPLVMLKEHHYPRPSLFTYPEESPVNGSSTLFSALLIKCLEKVVIALCRYTPRRNIPPYLVALVSQEEELDDQKIQVTTPGFQLVFLPFADDKRKVPFTEKVMATPEQVDNMKAIIQKLCFTYRSDSFENPVLQQHFGNLEPLILYLMEEQAVDLILPKVEEMNKRLGSMVNEFKELVYSPDYNPEGKITKRKCNNEGSRSKRPKRSIQKRS*

>EU224311.1_Homo sapiens NUKU2, complete cds

ATGGTGGAACCATGGGGACTTGGGGGTGGGGCAGAGGTGGGAACATTTGTATCAGTTAAGTCAGCTTCGTGGCTCCCTGTGGAGCCAGGGCTGAGCCTTGTGACGCGCACTCGCCAATTAGAGATTGATCAGCCAGCAGTCAAATGCATTCTCCAGTCCTTGCAAGAAGGATCAGCCTTTTCTGTGCCAGCCTCGATCGCCTTGTGCTTTGGTCTCTTTTTCTCCCCTGCTTGGATCCTGCCTCGCGCGGGCCGTCCTGTTGCTGAGACTCGGGGTACCGTTCTGCTGACCCAGCTCCCTTTAGTCACGTTTGCTTGGCTCTGGTACCAAATAGTTGGGATTACCGAAGAGTCCCCTTCCTCGCGTGTCAGCACAGATGCTGTGACTGCCACCCGCGTCCCCGTCAAGTGCCTGTGCCCGAGCTCGCCGCCGCCGTGTGTGCTGCGCTGATAGTTTCCAGTTGTTCTTTCTGGGTGATGGTGATATAGATGTACAGTACTACATGGCACTAATATATAGGAGTTTCCAGTTGTTCTTTCTGGGTGATGGTGATATAGATGTACAGTACTACATGGCACTAATATATAGGGGCTATGTTTGAATCTCAGAGCGAAGGTGAGTTGACTCCTTTTGACATGAGCATCCAGTGTATCCAAAGTGTGTACATGAGTAAGATCATAAGCAGTGATCGAGATCTTTATGATACTGAGAAAGACAAAAATTCAGTGAATTTTAAAAATATTTACGTCTTACAGGAGTTGGAAAATCCAGGTGCAAAACAAATTCTAAAGCTTGACCAGTTTAAGGGGCAGCAGGGACAAAAATGTTTCGAAGACCTGATGGGCCATGGATCTGACTACTCATTCAGTGAAGTTCTGGAATCCAGTTCACTTTGAGGAATCCAGCAATCTAGAAGACCTGTTGCAGAAGGTTCGTGCCAAGGAGACCAGGAAATGGGCACTCAGCAGGTTAAAGCTGAAGCTCAACAAAGACATAGTGATCTCTGTGGGCATTTACAGTCTCGTCCAGAAGGCTCTCAAGCCTCCTTCAATAAAACTCTATCGGAAAACAAATGAACCAGTGAAAACCAAGTCCCGGAAATTTAATATTAATACCGGCAGTTTGCTTCTGCCTAGCGATACCAAGCGGTCTCAGATCTATGGGAGTCATCAGATTATACTGGAGAAAGAGGAAACAGAAGAGCTAAAATGGTTTGATGAACCAGCTTTGATGCTCATGGTTTTCAAGCCCTTGGTAATGCTGAAGGAGCACCATTACCCGAGGCCCTCCTTGTTCACGTACCCTGAGGAGTCGCCGGTGAATGGGAGTTCAACCCTGTTCAGTGCTCTGCTCATTAAGTGTCTGGAGAAGGTGGTCATAGCATTGTGCAGATACACACCCCGCAGGAACATCCCCCCTTATTTGGTGGCTTTGGTGTCACAGGAAGAGGAGTTGGATGACCAGAAAATTCAGGTGACTACTCCAGGTTTCCAGCTGGTCTTTTTACCCTTTGCTGATGATAAAAGGAAGGTGCCCTTTACTGAAAAAGTCATGGCAACTCCAGAGCAGGTGGACAACATGAAGGCTATCATTCAGAAGCTCTGCTTCACATACAGAAGTGACAGCTTTGAGAACCCCGTGCTGCAGCAGCACTTCGGGAACCTGGAGCCCTTGATCTTGTATTTGATGGAGGAACAAGCAGTGGACCTTATATTACCCAAGGTTGAAGAAATGAATAAAAGACTGGGCTCCATGGTGAATGAGTTTAAGGAACTTGTCTACTCACCAGATTATAATCCTGAAGGGAAAATTACCAAGAGAAAATGCAATAATGAAGGTTCCAGAAGCAAAAGGCCCAAGCGGAGTATTCAGAAGAGGAGCTGAAATGCACAGGCTCTTCCACCAGGTGGAATCTTGCCTGCAGCATCTCTCCTGCCATCAAAGGTGCTGCCAAAGTGGCAAAGATCCTTTAAAGACTGATGGCACTTCTAAAGGAGGGGTTTCTCGTGGTTGGCACTACAGCCTCAGGCATTTGTACCACACTACTGGAGGTTCCCAATTATTCTTATGATCAGACCCTTGCAGCTTGAGTCATTGTGTTTCAAAGTATTTCAATAACATGTAAATCAGCAGCCTCTGTGGTTGGTTCTTTTCTGTTGTCACTCTTCCTACTAGCTTCTTTGATTTGGCATCC

>Predicted_EU224311 protein encoded (345aa) Predicted size 40kDa
MDLTTHSVKFWNPVHFEESSNLEDLLQKVRAKETRKWALSRLKLKLNKDIVISVGIYSLVQKALKPPSIKLYRKTNEPVKTKSRKFNINTGSLLLPSDTKRSQIYGSHQIILEKEETEELKWFDEPALMLMVFKPLVMLKEHHYPRPSLFTYPEESPVNGSSTLFSALLIKCLEKVVIALCRYTPRRNIPPYLVALVSQEEELDDQKIQVTTPGFQLVFLPFADDKRKVPFTEKVMATPEQVDNMKAIIQKLCFTYRSDSFENPVLQQHFGNLEPLILYLMEEQAVDLILPKVEEMNKRLGSMVNEFKELVYSPDYNPEGKITKRKCNNEGSRSKRPKRSIQKRS*

MUSCLE alignment of Ku70p with putative proteins derived from NUKU2 and two confirmed transcripts detected in humans.

CLUSTAL multiple sequence alignment by MUSCLE (3.8)

Ku70 MSGWESYYKTEGDEEAEEEQEENLEASGDYKYSGRDSLIFLVDASKAMFESQSEDELTPF

NUKU2 ------------------------------------------------------------

Predicted_EU224311 ------------------------------------------------------------

NUKU2_testis ------------------------------------------------------------

Ku70 DMSIQCIQSVYISKIISSDRDLLAVVFYGTEKDKNSVNFKNIYVLQELDNPGAKRILELD

NUKU2 -----------------------------MDLTTHSVKFWN-------------------

Predicted_EU224311 -----------------------------MDLTTHSVKFWN-------------------

NUKU2_testis ------------------------------------------------------------

Ku70 QFKGQQGQKRFQDMMGHGSDYSLSEVLWVCANLFSDVQFKMSHKRIMLFTNEDNPHGNDS

NUKU2 ------------------------------------------------------------

Predicted_EU224311 ------------------------------------------------------------

NUKU2_testis ------------------------------------------------------------

Ku70 AKASRARTKAGDLRDTGIFLDLMHLKKPGGFDISLFYRDIISIAEDEDLRVHFEESSKLE

NUKU2 -------------------------------------------------PVHFEESSNLE

Predicted_EU224311 -------------------------------------------------PVHFEESSNLE

NUKU2_testis ------------------------------------------------------------

Ku70 DLLRKVRAKETRKRALSRLKLKLNKDIVISVGIYNLVQKALKPPPIKLYRETNEPVKTKT

NUKU2 DLLQKVRAKETRKWALSRLKLKLNKDIVISVGIYSLVQKALKPPSIKLYRKTNEPVKTKS

Predicted_EU224311 DLLQKVRAKETRKWALSRLKLKLNKDIVISVGIYSLVQKALKPPSIKLYRKTNEPVKTKS

NUKU2_testis ------------------------------------------------------------

Ku70 RTFNTSTGGLLLPSDTKRSQIYGSRQIILEKEETEELKRFDDPGLMLMGFKPLVLLKKHH

NUKU2 RKFNINTGSLLLPSDTKRSQIYGSHQIILEKEETEELKWFDEPALMLMVFKPLVMLKEHH

Predicted_EU224311 RKFNINTGSLLLPSDTKRSQIYGSHQIILEKEETEELKWFDEPALMLMVFKPLVMLKEHH

NUKU2_testis ---------------------------------------------MLMVFKPLVMLKEHH

***** *****:**:****

Ku70 YLRPSLFVYPEESLVIGSSTLFSALLIKCLEKEVAALCRYTPRRNIPPYFVALVPQEEEL

NUKU2 YPRPSLFTYPEESPVNGSSTLFSALLIKCLEKVVIALCRYTPRRNIPPYLVALVSQEEEL

Predicted_EU224311 YPRPSLFTYPEESPVNGSSTLFSALLIKCLEKVVIALCRYTPRRNIPPYLVALVSQEEEL

NUKU2_testis YPRPSLFTYPEESPVNGSSTLFSALLIKCLEKVVIALCRYTPRRNIPPYLVALVSQEEEL

*** *****.***** * **************** * **************:****.*******

Ku70 DDQKIQVTPPGFQLVFLPFADDKRKMPFTEKIMATPEQVGKMKAIVEKLRFTYRSDSFEN

NUKU2 DDQKIQVTTPGFQLVFLPFADDKRKVPFTEKVMATPEQVDNMKAIIQKLCFTYRSDSFEN

Predicted_EU224311 DDQKIQVTTPGFQLVFLPFADDKRKVPFTEKVMATPEQVDNMKAIIQKLCFTYRSDSFEN

NUKU2_testis DDQKIQVTTPGFQLVFLPFADDKRKVPFTEKVMATPEQVDNMKAIIQKLCFTYRSDSFEN

**********.****************:*****:*******.:****::** ************

Ku70 PVLQQHFRNLEALALDLMEPEQAVDLTLPKVEAMNKRLGSLVDEFKELVYPPDYNPEGKV

NUKU2 PVLQQHFGNLEPLILYLME-EQAVDLILPKVEEMNKRLGSMVNEFKELVYSPDYNPEGKI

Predicted_EU224311 PVLQQHFGNLEPLILYLME-EQAVDLILPKVEEMNKRLGSMVNEFKELVYSPDYNPEGKI

NUKU2_testis PVLQQHFGNLEPLILYLME-EQAVDLILPKVEEMNKRLGSMVNEFKELVYSPDYNPEGKI

********* ***.* * *** ****** ***** *******:*:*******.********:**

Ku70 TKRKHDNEGSGSKRPKVEYSEEELKTHISKGTLGKFTVPMLKEACRAYGLKSGLKKQELL

NUKU2 TKRKCNNEGSRSKRP-----------------------------------KRSIQKRS--

Predicted_EU224311 TKRKCNNEGSRSKRP-----------------------------------KRSIQKRS--

NUKU2_testis TKRKCNNEGSRSKRP-----------------------------------KRSIQKRS--

****** :**** **** * .::*..**

Ku70 EALTKHFQD

NUKU2 ---------

Predicted_EU224311 ---------

NUKU2_testis ---------
